# Supplementary material for: Construction of a nontoxic nano-pesticide and its co-application with natural predators for perfect cooperative pest management: an innovative strategy for pesticide reduction
Source: Royal Society of Chemistry journal article supplement (doi:10.1039/d4en00060a), 2024-01-01
Supplement: d4en00060a1.pdf [file d4en00060a1.pdf]

## **Supplementary material**

### **Construction of a nontoxic nano-pesticide toward natural predator for perfect cooperative pest management: An innovative strategy for pesticide reduction**

Shangyuan Wu <sup>a,#</sup>, Qinhong Jiang <sup>a,#</sup>, Chunyang Huang <sup>b,#</sup>, Hailin Yang <sup>c</sup>, Changhua Zhang <sup>b</sup>, Meizhen Yin <sup>d</sup>, Jie Shen <sup>a</sup>, Shuo Yan <sup>a,\*</sup>, Hu Li <sup>a,\*</sup>

<sup>a</sup> *College of Plant Protection, China Agricultural University, Beijing 100193, P. R. China*

<sup>b</sup> *Guizhou Tobacco Company, Zunyi Branch, Zunyi 563000, P. R. China*

<sup>c</sup> *Yunnan Tobacco Company, Yuxi Branch, Yuxi 653100, P. R. China*

<sup>d</sup> *State Key Laboratory of Chemical Resource Engineering, Beijing Lab of Biomedical Materials, Beijing University of Chemical Technology, Beijing 100029, P. R. China*

# These authors have contributed equally to this work.

\* Corresponding authors. College of Plant Protection, China Agricultural University, Beijing 100193, P. R. China.

E-mail addresses: yanshuo2011@foxmail.com (S. Yan) and tigerleecau@hotmail.com (H. Li).

## Supplementary Figure

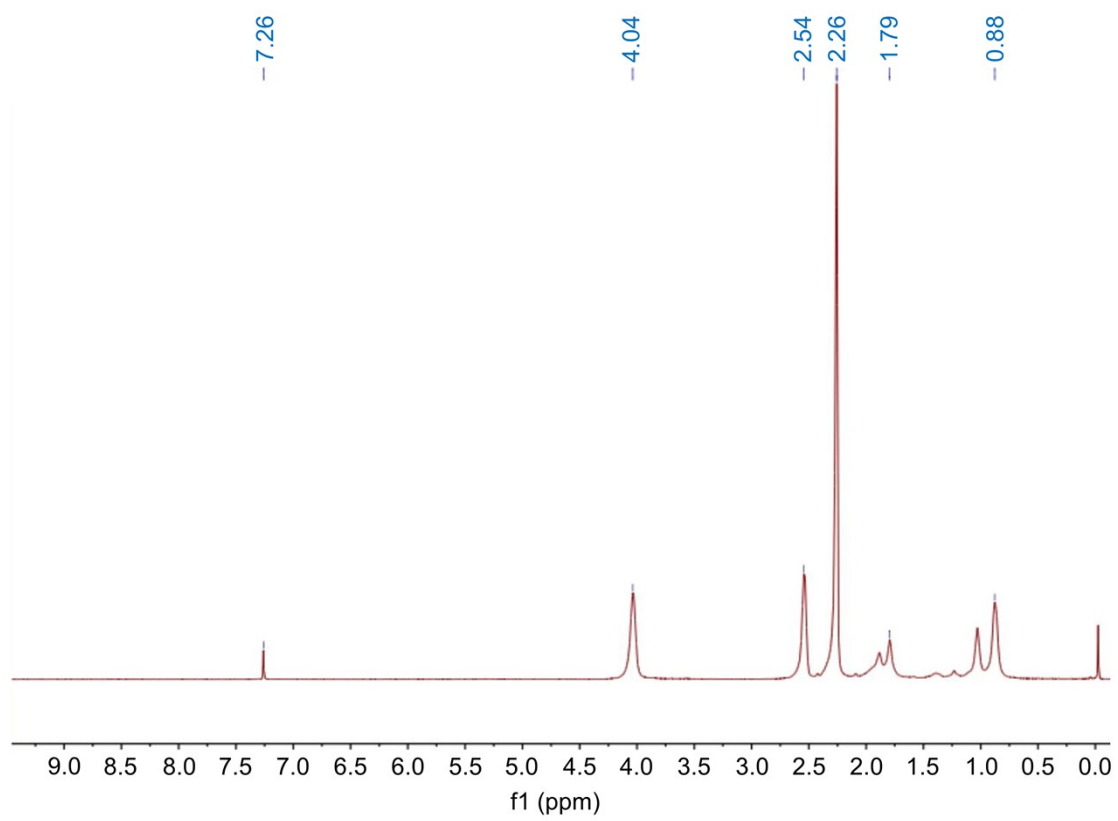

Figure S1. <sup>1</sup>H NMR spectrum of SPc in CDCl<sub>3</sub>.

## Supplementary Tables

Table S1. Primers for quantitative real-time PCR.

| Gene name                                             | Primer       | Sequence              |
|-------------------------------------------------------|--------------|-----------------------|
| <i>Vacuolar protein sorting-associated protein 4A</i> | VPS4A-F      | TGGCTTGGTGAGTCTGAGAG  |
|                                                       | VPS4A-R      | CCCACGGTATGTTGGTAGCT  |
| <i>Rab11 family-interacting protein 1</i>             | RAB11FIP1-F  | AGGTGAAGCAGATCCAGGTG  |
|                                                       | RAB11FIP1-R  | TAGGTGGTTTTGCAGGAGGA  |
| <i>ADP-ribosylation factor 1</i>                      | ARF1-F       | GCGCCACCAATATTCAGGAG  |
|                                                       | ARF1-R       | AATACAACCTTGAGCCGTCGC |
| <i>Trehalase</i>                                      | TREH-F       | ACACTGGGGAACAATGGGAT  |
|                                                       | TREH-R       | CCGCCTGTCTTTCCAACCTC  |
| <i>Phosphoenolpyruvate carboxykinase [GTP]</i>        | PckG-F       | GGAGGTAATTCGCTGCTTGG  |
|                                                       | PckG-R       | GCCAACACACTCCACTTTGT  |
| <i>Folate-binding protein 1</i>                       | FBP1-F       | GGATGTAGACTGTGCTGGGT  |
|                                                       | FBP1-R       | TATTTTCCCCTTTTGCGGCA  |
| <i>Acetyl-CoA carboxylase 1</i>                       | ACC1-F       | GACCCTGACTGCTTCTGAGT  |
|                                                       | ACC1 -R      | GATAGTGGGCATGCTTGTGG  |
| <i>Beta-actin</i>                                     | Beta-actin-F | CACCTTCTACAACGAGCTGC  |
|                                                       | Beta-actin-R | AGGCGTAGAGGGAGAGTACA  |

Table S2. Sequencing quality and genome mapping.

| Sample    | Total clean reads (M) | Q20    | GC percent | Percentage of mapped reads |
|-----------|-----------------------|--------|------------|----------------------------|
| SPc-1     | 69.43                 | 97.71% | 34.30%     | 87.36%                     |
| SPc-2     | 67.47                 | 97.62% | 33.98%     | 88.38%                     |
| SPc-3     | 67.3                  | 97.75% | 34.04%     | 88.63%                     |
| Control-1 | 67.53                 | 97.63% | 34.30%     | 89.35%                     |
| Control-2 | 70.32                 | 97.65% | 34.30%     | 88.57%                     |
| Control-3 | 67.22                 | 97.66% | 34.45%     | 89.12%                     |
